# Supplementary material for: Epitope resurfacing on dengue virus-like particle vaccine preparation to induce broad neutralizing antibody
Source: eLife. 2018 Oct 18;7:e38970. doi: 10.7554/eLife.38970 (PMC6234032; doi:10.7554/eLife.38970)
Supplement: Figure 4—source data 1. [file elife-38970-fig4-data1.xls]

## Sheet: 4G2
SUNRISE; Serial number: 606000089; Firmware: V 3.31 25/08/05; XFLUOR4 Version: V 4.51
Date:					2014-05-13
Time:					1899-12-31 21:57:01
Measurement mode:					Absorbance
Measurement wavelength:					450	nm
Read mode:					Normal
Rawdata
<>	1	IM		WT		CFAVP1P8/E203S		De2H2		BSA		12
A	0.033	0.206	0.197	0.228	0.253	0.393	0.443	0.375	0.297	0.071	0.075	0.029
B	0.032	0.17	0.164	0.182	0.217	0.322	0.409	0.329	0.344	0.077	0.082	0.032
C	0.03	0.137	0.129	0.166	0.186	0.261	0.3	0.285	0.273	0.06	0.065	0.03
D	0.029	0.127	0.117	0.14	0.164	0.244	0.257	0.268	0.251	0.065	0.068	0.03
E	0.029	0.105	0.101	0.116	0.129	0.179	0.219	0.187	0.178	0.058	0.057	0.029
F	0.031	0.094	0.091	0.094	0.111	0.172	0.181	0.178	0.186	0.062	0.07	0.029
G	0.037	0.09	0.084	0.089	0.1	0.143	0.16	0.158	0.155	0.067	0.067	0.059
H	0.029	0.108	0.086	0.099	0.103	0.146	0.148	0.14	0.15	0.072	0.086	0.04
P/N
	IM		WT		CFAVP1P8/E203S		De2H2
1000	2.90141	2.62667	3.21127	3.37333	5.53521	5.90667	5.28169	3.96
2000	2.20779	2	2.36364	2.64634	4.18182	4.9878	4.27273	4.19512
4000	2.28333	1.98462	2.76667	2.86154	4.35	4.61538	4.75	4.2
8000	1.95385	1.72059	2.15385	2.41176	3.75385	3.77941	4.12308	3.69118
16000	1.81034	1.77193	2	2.26316	3.08621	3.84211	3.22414	3.12281
32000	1.51613	1.3	1.51613	1.58571	2.77419	2.58571	2.87097	2.65714
64000	1.34328	1.25373	1.32836	1.49254	2.13433	2.38806	2.35821	2.31343
128000	1.5	1	1.375	1.19767	2.02778	1.72093	1.94444	1.74419

## Sheet: 4G2-B
SUNRISE; Serial number: 606000089; Firmware: V 3.31 25/08/05; XFLUOR4 Version: V 4.51
Date:					2014-05-13
Time:					1899-12-31 21:57:47
Measurement mode:					Absorbance
Measurement wavelength:					450	nm
Read mode:					Normal
Rawdata
<>	1	IM		WT		CFAVP1P8/E203S		De2H2		BSA		12
2000	0.028	0.209	0.175	0.179	0.239	0.32	0.383	0.271	0.315	0.065	0.071	0.03
4000	0.034	0.159	0.127	0.153	0.192	0.268	0.306	0.238	0.264	0.066	0.068	0.029
8000	0.029	0.104	0.116	0.12	0.143	0.179	0.182	0.171	0.224	0.055	0.057	0.034
16000	0.03	0.093	0.1	0.097	0.113	0.16	0.175	0.164	0.204	0.056	0.061	0.03
32000	0.029	0.094	0.09	0.1	0.099	0.143	0.155	0.151	0.178	0.055	0.06	0.029
64000	0.03	0.084	0.074	0.08	0.087	0.131	0.141	0.132	0.151	0.058	0.057	0.029
128000	0.028	0.063	0.07	0.075	0.071	0.109	0.12	0.099	0.12	0.056	0.055	0.029
256000	0.034	0.07	0.086	0.064	0.082	0.091	0.116	0.089	0.123	0.073	0.064	0.032
P/N	IM		WT		CFAVP1P8/E203S		De2H2
1000	3.21538	2.46479	2.75385	3.3662	4.92308	5.39437	4.16923	4.43662
2000	2.40909	1.86765	2.31818	2.82353	4.06061	4.5	3.60606	3.88235
4000	1.89091	2.03509	2.18182	2.50877	3.25455	3.19298	3.10909	3.92982
8000	1.66071	1.63934	1.73214	1.85246	2.85714	2.86885	2.92857	3.34426
16000	1.70909	1.5	1.81818	1.65	2.6	2.58333	2.74545	2.96667
32000	1.44828	1.29825	1.37931	1.52632	2.25862	2.47368	2.27586	2.64912
64000	1.125	1.27273	1.33929	1.29091	1.94643	2.18182	1.76786	2.18182
128000	0.958904	1.34375	0.876712	1.28125	1.24658	1.8125	1.21918	1.92188

## Sheet: 9D12
SUNRISE; Serial number: 606000089; Firmware: V 3.31 25/08/05; XFLUOR4 Version: V 4.51
Date:					2014-05-13
Time:					1899-12-31 21:58:41
Measurement mode:					Absorbance
Measurement wavelength:					450	nm
Read mode:					Normal
Rawdata
<>	1	IM		WT		CFAVP1P8/E203S		De2H2		BSA		12
A	0.033	0.107	0.078	0.073	0.087	0.084	0.085	0.088	0.087	0.087	0.08	0.03
B	0.028	0.211	0.148	0.071	0.077	0.076	0.08	0.079	0.082	0.082	0.074	0.029
C	0.028	0.09	0.068	0.073	0.076	0.079	0.077	0.073	0.066	0.074	0.068	0.029
D	0.028	0.076	0.067	0.069	0.074	0.082	0.079	0.071	0.072	0.072	0.066	0.029
E	0.031	0.077	0.068	0.066	0.076	0.078	0.078	0.074	0.065	0.081	0.065	0.03
F	0.029	0.077	0.065	0.063	0.071	0.073	0.079	0.077	0.075	0.08	0.068	0.033
G	0.027	0.079	0.07	0.062	0.077	0.076	0.081	0.075	0.081	0.074	0.074	0.034
H	0.033	0.096	0.084	0.077	0.085	0.088	0.093	0.082	0.074	0.08	0.077	0.03

## Sheet: 9D12-B
SUNRISE; Serial number: 606000089; Firmware: V 3.31 25/08/05; XFLUOR4 Version: V 4.51
Date:					2014-05-13
Time:					1899-12-31 21:59:19
Measurement mode:					Absorbance
Measurement wavelength:					450	nm
Read mode:					Normal
Rawdata
<>	1	IM		WT		CFAVP1P8/E203S		De2H2		BSA		12
A	0.032	0.095	0.081	0.077	0.087	0.088	0.091	0.079	0.087	0.09	0.077	0.031
B	0.028	0.077	0.077	0.074	0.081	0.082	0.087	0.086	0.082	0.087	0.083	0.029
C	0.028	0.082	0.087	0.077	0.084	0.083	0.088	0.086	0.087	0.094	0.083	0.03
D	0.028	0.081	0.079	0.077	0.081	0.079	0.081	0.084	0.081	0.083	0.084	0.028
E	0.028	0.082	0.076	0.077	0.083	0.079	0.083	0.082	0.08	0.084	0.08	0.029
F	0.027	0.08	0.078	0.077	0.08	0.083	0.077	0.085	0.085	0.088	0.085	0.028
G	0.027	0.081	0.078	0.077	0.08	0.082	0.087	0.087	0.089	0.091	0.085	0.029
H	0.029	0.082	0.078	0.078	0.08	0.082	0.083	0.085	0.084	0.087	0.081	0.029

## Sheet: 42-3
SUNRISE; Serial number: 606000089; Firmware: V 3.31 25/08/05; XFLUOR4 Version: V 4.51
Date:					2014-05-13
Time:					1899-12-31 22:00:01
Measurement mode:					Absorbance
Measurement wavelength:					450	nm
Read mode:					Normal
Rawdata
<>	1	IM		WT		CFAVP1P8/E203S		De2H2		BSA		12
A	0.031	0.512	0.499	0.376	0.397	0.484	0.486	0.409	0.394	0.082	0.071	0.03
B	0.029	0.437	0.44	0.301	0.334	0.367	0.389	0.365	0.361	0.077	0.068	0.03
C	0.029	0.387	0.361	0.244	0.281	0.304	0.305	0.304	0.3	0.074	0.064	0.031
D	0.028	0.375	0.356	0.241	0.247	0.244	0.241	0.264	0.252	0.08	0.074	0.031
E	0.028	0.302	0.284	0.193	0.209	0.191	0.194	0.206	0.209	0.075	0.076	0.029
F	0.029	0.22	0.208	0.152	0.159	0.147	0.153	0.161	0.163	0.076	0.065	0.03
G	0.028	0.164	0.147	0.11	0.124	0.118	0.126	0.128	0.127	0.081	0.07	0.03
H	0.03	0.154	0.146	0.114	0.112	0.104	0.113	0.121	0.121	0.081	0.085	0.033
P/N	IM		WT		CFAVP1P8/E203S		De2H2
1000	6.2439	7.02817	4.58537	5.59155	5.90244	6.84507	4.9878	5.5493
2000	5.67532	6.47059	3.90909	4.91176	4.76623	5.72059	4.74026	5.30882
4000	5.22973	5.64062	3.2973	4.39062	4.10811	4.76562	4.10811	4.6875
8000	4.6875	4.81081	3.0125	3.33784	3.05	3.25676	3.3	3.40541
16000	4.02667	3.73684	2.57333	2.75	2.54667	2.55263	2.74667	2.75
32000	2.89474	3.2	2	2.44615	1.93421	2.35385	2.11842	2.50769
64000	2.02469	2.1	1.35802	1.77143	1.45679	1.8	1.58025	1.81429
128000	1.90123	1.71765	1.40741	1.31765	1.28395	1.32941	1.49383	1.42353

## Sheet: 42-3-B
SUNRISE; Serial number: 606000089; Firmware: V 3.31 25/08/05; XFLUOR4 Version: V 4.51
Date:					2014-05-13
Time:					1899-12-31 22:00:44
Measurement mode:					Absorbance
Measurement wavelength:					450	nm
Read mode:					Normal
Rawdata
<>	1	IM		WT		CFAVP1P8/E203S		De2H2		BSA		12
A	0.044	0.531	0.497	0.368	0.384	0.424	0.433	0.417	0.41	0.104	0.089	0.049
B	0.046	0.46	0.446	0.322	0.345	0.342	0.375	0.35	0.349	0.095	0.092	0.046
C	0.049	0.381	0.417	0.299	0.306	0.28	0.294	0.312	0.317	0.089	0.077	0.043
D	0.043	0.353	0.346	0.257	0.259	0.234	0.208	0.279	0.274	0.09	0.079	0.046
E	0.04	0.295	0.283	0.186	0.207	0.179	0.191	0.214	0.207	0.086	0.074	0.044
F	0.04	0.224	0.21	0.165	0.164	0.145	0.152	0.165	0.169	0.086	0.077	0.049
G	0.043	0.168	0.163	0.122	0.14	0.125	0.125	0.133	0.141	0.079	0.078	0.054
H	0.046	0.138	0.126	0.106	0.116	0.121	0.111	0.133	0.12	0.088	0.08	0.05
P/N	IM		WT		CFAVP1P8/E203S		De2H2
1000	5.10577	5.58427	3.53846	4.31461	4.07692	4.86517	4.00962	4.60674
2000	4.84211	4.84783	3.38947	3.75	3.6	4.07609	3.68421	3.79348
4000	4.2809	5.41558	3.35955	3.97403	3.14607	3.81818	3.50562	4.11688
8000	3.92222	4.37975	2.85556	3.27848	2.6	2.63291	3.1	3.46835
16000	3.43023	3.82432	2.16279	2.7973	2.0814	2.58108	2.48837	2.7973
32000	2.60465	2.72727	1.9186	2.12987	1.68605	1.97403	1.9186	2.19481
64000	2.12658	2.08974	1.5443	1.79487	1.58228	1.60256	1.68354	1.80769
128000	1.56818	1.575	1.20455	1.45	1.375	1.3875	1.51136	1.5

## Sheet: 3H5
SUNRISE; Serial number: 606000089; Firmware: V 3.31 25/08/05; XFLUOR4 Version: V 4.51
Date:					2014-05-13
Time:					1899-12-31 22:01:32
Measurement mode:					Absorbance
Measurement wavelength:					450	nm
Read mode:					Normal
Rawdata
<>	1	IM		WT		CFAVP1P8/E203S		De2H2		BSA		12
A	0.058	0.394	0.31	0.349	0.404	0.61	0.64	0.727	0.673	0.153	0.138	0.032
B	0.044	0.207	0.205	0.257	0.285	0.424	0.448	0.514	0.473	0.086	0.08	0.031
C	0.028	0.161	0.16	0.192	0.209	0.363	0.377	0.335	0.289	0.072	0.071	0.03
D	0.03	0.132	0.114	0.144	0.148	0.259	0.27	0.226	0.2	0.07	0.07	0.031
E	0.031	0.117	0.088	0.103	0.113	0.171	0.177	0.153	0.144	0.066	0.067	0.035
F	0.035	0.092	0.074	0.079	0.086	0.119	0.123	0.107	0.093	0.068	0.073	0.035
G	0.033	0.069	0.063	0.061	0.072	0.087	0.084	0.089	0.078	0.085	0.065	0.034
H	0.03	0.089	0.071	0.068	0.086	0.094	0.092	0.098	0.079	0.068	0.067	0.031
P/N	IM		WT		CFAVP1P8/E203S		De2H2
1000	2.57516	2.24638	2.28105	2.92754	3.98693	4.63768	4.75163	4.87681
2000	2.40698	2.5625	2.98837	3.5625	4.93023	5.6	5.97674	5.9125
4000	2.23611	2.25352	2.66667	2.94366	5.04167	5.30986	4.65278	4.07042
8000	1.88571	1.62857	2.05714	2.11429	3.7	3.85714	3.22857	2.85714
16000	1.77273	1.31343	1.56061	1.68657	2.59091	2.64179	2.31818	2.14925
32000	1.35294	1.0137	1.16176	1.17808	1.75	1.68493	1.57353	1.27397
64000	0.811765	0.969231	0.717647	1.10769	1.02353	1.29231	1.04706	1.2
128000	1.30882	1.0597	1	1.28358	1.38235	1.37313	1.44118	1.1791

## Sheet: 3H5-B
SUNRISE; Serial number: 606000089; Firmware: V 3.31 25/08/05; XFLUOR4 Version: V 4.51
Date:					2014-05-13
Time:					1899-12-31 22:02:02
Measurement mode:					Absorbance
Measurement wavelength:					450	nm
Read mode:					Normal
Rawdata
<>	1	IM		WT		CFAVP1P8/E203S		De2H2		BSA		12
A	0.028	0.387	0.347	0.434	0.444	0.777	0.781	0.753	0.746	0.174	0.17	0.032
B	0.029	0.292	0.259	0.306	0.321	0.593	0.581	0.511	0.525	0.102	0.094	0.029
C	0.032	0.182	0.166	0.214	0.222	0.427	0.421	0.353	0.342	0.086	0.078	0.03
D	0.028	0.136	0.123	0.141	0.154	0.267	0.263	0.224	0.239	0.08	0.072	0.03
E	0.028	0.105	0.101	0.108	0.121	0.186	0.185	0.162	0.166	0.076	0.076	0.029
F	0.029	0.093	0.084	0.085	0.1	0.133	0.138	0.123	0.124	0.078	0.067	0.028
G	0.029	0.08	0.075	0.076	0.091	0.107	0.109	0.104	0.1	0.079	0.078	0.028
H	0.028	0.087	0.078	0.076	0.084	0.089	0.094	0.097	0.084	0.082	0.069	0.03
P/N	IM		WT		CFAVP1P8/E203S		De2H2
1000	2.22414	2.04118	2.49425	2.61176	4.46552	4.59412	4.32759	4.38824
2000	2.86275	2.75532	3	3.41489	5.81373	6.18085	5.0098	5.58511
4000	2.11628	2.12821	2.48837	2.84615	4.96512	5.39744	4.10465	4.38462
8000	1.7	1.70833	1.7625	2.13889	3.3375	3.65278	2.8	3.31944
16000	1.38158	1.32895	1.42105	1.59211	2.44737	2.43421	2.13158	2.18421
32000	1.19231	1.25373	1.08974	1.49254	1.70513	2.0597	1.57692	1.85075
64000	1.01266	0.961538	0.962025	1.16667	1.35443	1.39744	1.31646	1.28205
128000	1.06098	1.13043	0.926829	1.21739	1.08537	1.36232	1.18293	1.21739

## Sheet: 1A1D2
SUNRISE; Serial number: 606000089; Firmware: V 3.31 25/08/05; XFLUOR4 Version: V 4.51
Date:					2014-05-13
Time:					1899-12-31 22:02:29
Measurement mode:					Absorbance
Measurement wavelength:					450	nm
Read mode:					Normal
Rawdata
<>	1	IM		WT		CFAVP1P8/E203S		De2H2		BSA		12
A	0.029	0.083	0.065	0.066	0.068	0.08	0.085	0.067	0.067	0.074	0.078	0.022
B	0.03	0.069	0.06	0.051	0.063	0.068	0.061	0.056	0.046	0.054	0.062	0.019
C	0.029	0.069	0.063	0.056	0.063	0.054	0.052	0.053	0.045	0.067	0.061	0.029
D	0.034	0.071	0.059	0.052	0.06	0.066	0.063	0.065	0.049	0.055	0.059	0.02
E	0.03	0.07	0.053	0.049	0.05	0.053	0.052	0.057	0.042	0.05	0.058	0.028
F	0.029	0.071	0.053	0.044	0.06	0.055	0.054	0.057	0.041	0.051	0.061	0.028
G	0.029	0.072	0.062	0.053	0.055	0.059	0.064	0.059	0.047	0.061	0.061	0.03
H	0.031	0.071	0.06	0.054	0.065	0.068	0.066	0.061	0.057	0.058	0.067	0.029
P/N	IM		WT		CFAVP1P8/E203S		De2H2
1000	1.12162	0.833333	0.891892	0.871795	1.08108	1.08974	0.905405	0.858974
2000	1.27778	0.967742	0.944444	1.01613	1.25926	0.983871	1.03704	0.741935
4000	1.02985	1.03279	0.835821	1.03279	0.80597	0.852459	0.791045	0.737705
8000	1.29091	1	0.945455	1.01695	1.2	1.0678	1.18182	0.830508
16000	1.4	0.913793	0.98	0.862069	1.06	0.896552	1.14	0.724138
32000	1.39216	0.868852	0.862745	0.983607	1.07843	0.885246	1.11765	0.672131
64000	1.18033	1.01639	0.868852	0.901639	0.967213	1.04918	0.967213	0.770492
128000	1.22414	0.895522	0.931034	0.970149	1.17241	0.985075	1.05172	0.850746

## Sheet: 1A1D2-B
SUNRISE; Serial number: 606000089; Firmware: V 3.31 25/08/05; XFLUOR4 Version: V 4.51
Date:					2014-05-13
Time:					1899-12-31 22:03:32
Measurement mode:					Absorbance
Measurement wavelength:					450	nm
Read mode:					Normal
Rawdata
<>	1	IM		WT		CFAVP1P8/E203S		De2H2		BSA		12
A	0.029	0.075	0.062	0.06	0.068	0.074	0.074	0.08	0.077	0.089	0.086	0.039
B	0.032	0.067	0.057	0.057	0.062	0.067	0.066	0.076	0.069	0.071	0.063	0.03
C	0.03	0.063	0.057	0.055	0.063	0.064	0.064	0.075	0.069	0.07	0.062	0.032
D	0.03	0.064	0.055	0.051	0.058	0.06	0.067	0.073	0.073	0.064	0.06	0.03
E	0.03	0.072	0.056	0.055	0.068	0.066	0.062	0.066	0.062	0.067	0.064	0.031
F	0.031	0.066	0.059	0.057	0.061	0.061	0.07	0.07	0.07	0.072	0.071	0.031
G	0.029	0.073	0.057	0.056	0.062	0.075	0.075	0.081	0.07	0.068	0.073	0.032
H	0.034	0.075	0.082	0.066	0.076	0.075	0.077	0.076	0.074	0.078	0.077	0.036
P/N	IM		WT		CFAVP1P8/E203S		De2H2
1000	0.842697	0.72093	0.674157	0.790698	0.831461	0.860465	0.898876	0.895349
2000	0.943662	0.904762	0.802817	0.984127	0.943662	1.04762	1.07042	1.09524
4000	0.9	0.919355	0.785714	1.01613	0.914286	1.03226	1.07143	1.1129
8000	1	0.916667	0.796875	0.966667	0.9375	1.11667	1.14062	1.21667
16000	1.07463	0.875	0.820896	1.0625	0.985075	0.96875	0.985075	0.96875
32000	0.916667	0.830986	0.791667	0.859155	0.847222	0.985915	0.972222	0.985915
64000	1.07353	0.780822	0.823529	0.849315	1.10294	1.0274	1.19118	0.958904
128000	0.961538	1.06494	0.846154	0.987013	0.961538	1	0.974359	0.961039

[truncated: 2 more sheets: 155-49, 155-49-B]
