# Supplementary material for: Epitope resurfacing on dengue virus-like particle vaccine preparation to induce broad neutralizing antibody
Source: eLife. 2018 Oct 18;7:e38970. doi: 10.7554/eLife.38970 (PMC6234032; doi:10.7554/eLife.38970)
Supplement: Figure 5—source data 1. [file elife-38970-fig5-data1.xlsx]

## Sheet: Fig 5A
	wtD2VLP	wtD2VLP	imD2VLP	imD2VLP	mD2VLP	mD2VLP
12.5	2.2065	2.142	2.0165	2.058	2.178	2.3405
6.25	1.347	1.489	1.4025	1.1185	1.402	1.596
3.125	0.9625	1.0465	0.99	0.8415	0.8625	1.0725
1.5625	0.6505	0.7425	0.7605	0.581	0.6915	0.8085
0.78125	0.5255	0.647	0.6115	0.4175	0.498	0.512
0.390625	0.433	0.5665	0.5325	0.366	0.413	0.4145
0.195313	0.346	0.4935	0.513	0.3225	0.3345	0.362
0.097656	0.346	0.502	0.513	0.257	0.3465	0.399

## Sheet: Fig 5B
	Wild-type vaccinated mice						imD2VLP vaccinated mice						mD2VLP vaccinated mice
wtD2VLP	61177.9	35672	22261.2	30534.5	264069		31051.7	90222	74168.6	68794.9	11494.7		4454.87	10585.2	5124.52	2140.29	7176.33
imD2VLP	55628	42588.2	23884.8	43946.6	310672		43430.3	101020	83265.6	75901	36198.3		14638.9	9708.88	36059.7	12057.9	24729.7
mD2VLP	54526.2	53443.8	27991.7	65437	55247.8		90586.3	243627	56356.7	65337.9	123490		93502	126969	85073	74031	81451

## Sheet: Fig5C
	DENV-1 PRNT50						DENV-2 PRNT50						DENV-3 PRNT50						DENV-4 PRNT50
wtD2VLP	144.955	160.196	125.584	156.965	143.727		173.678	197.558	222.817	348.443	638.568		59.0981	48.7421	98.8338	72.0238	113.127		56.9944	402.147	89.6637	103.651	118.666
imD2VLP	126.99	83.3199	128.945	66.715	96.7757		186.163	240.763	212.704	198.874	197.639		90.2656	52.6624	50.0739	59.8805	98.6976		97.7628	68.1658	51.6877	60.1953	102.022
mD2VLP	355.501	290.231	262.367	319.84	327.005		1328.51	359.704	384.485	272.072	642.397		73.8672	62.0657	57.808	71.2125	53.0877		109.042	155.242	186.356	168.197	86.0831

## Sheet: Fig 5D
	Group 1: wtD2VLP					Group 2: imD2VLP					Group 3: mD2VLP
	imD2VLP		imD2VLP2H2			imD2VLP		imD2VLP2H2			imD2VLP		imD2VLP2H2
500	5.81407	5.66931	2.84993	2.66438		5.45947	5.27666	3.06833	2.81479		5.62966	4.51422	3.17954	3.5354
1000	5.54277	5.24706	2.28891	2.15944		6.13006	6.09403	3.15165	2.69997		5.56102	4.46126	3.04328	3.34146
2000	4.77978	4.09913	2.10185	1.92296		5.88216	5.65466	2.96568	2.55385		5.26593	4.07844	2.80879	3.15256
4000	3.56261	3.15908	1.77959	1.58761		4.75341	4.46507	2.45158	2.20816		3.93697	3.34513	2.43842	2.55286
8000	2.76983	2.23739	1.38403	1.37503		3.38463	3.25514	1.96464	1.62631		3.41614	2.8461	1.95117	2.17441
16000	2.0043	1.6597	1.17536	1.2447		2.36441	2.32784	1.56573	1.42373		2.47726	2.14895	1.58287	1.79136
32000	1.57744	1.37878	1.0722	1.19095		1.81266	1.66665	1.32148	1.23356		1.99911	1.74521	1.5431	1.53125
64000	1.35831	1.14412	1.04505	1.13528		1.44091	1.32656	1.16039	1.12312		1.66318	1.45192	1.25879	1.3736
