# Supplementary material for: Epitope resurfacing on dengue virus-like particle vaccine preparation to induce broad neutralizing antibody
Source: eLife. 2018 Oct 18;7:e38970. doi: 10.7554/eLife.38970 (PMC6234032; doi:10.7554/eLife.38970)
Supplement: Figure 6—source data 1. [file elife-38970-fig6-data1.xlsx]

## Sheet: Fig 6A
DENV-1	DM8-6		DM25-3			DENV-2	DM8-6		DM25-3			DENV-3	DM8-6		DM 25-3			DENV-4	DM8-6		DM 25-3
1.14	1.50277	1.64396	11.9719	11.6675		0.285	23.0252	23.6688	14.0931	16.543		2.28	1.18889	1.21111	13.2928	13.0726		1.14	1.24419	1.2093	21.0498	21.4513
0.57	1.37183	1.51341	11.6675	11.7555		0.1425	23.9385	24.1132	13.2502	13.3967		1.14	1.10309	1.13402	14.2883	13.3566		0.57	1.07954	1.11364	21.5813	21.7729
0.285	1.32746	1.36314	10.6628	10.8202		0.07125	19.3145	20.7393	10.1678	10.5565		0.57	1.11364	1.06818	14.0538	12.4743		0.285	1.04494	1.03371	20.9505	20.5311
0.1425	1.24819	1.31224	8.35346	7.95118		0.035625	22.5524	19.7352	6.81205	7.96557		0.285	1.04819	1.10843	13.0655	12.1078		0.1425	1.11392	1.12658	19.252	18.7533
0.07125	1.13074	1.22303	6.50469	7.00089		0.017813	16.4492	13.9644	5.31561	5.13248		0.1425	1.12791	1.03488	11.3738	9.98088		0.07125	0.941176	1.04706	16.4497	15.9628
0.035625	1.11765	1.11867	4.08814	4.11463		0.008906	9.08782	8.41923	3.35487	3.22676		0.07125	1.06818	0.931818	8.61013	9.1864		0.035625	1	1.01149	13.9233	13.4327
0.017813	1.11765	1.11867	3.06078	2.97488		0.004453	5.36843	4.73406	2.17511	2.0646		0.035625	0.956989	0.956989	6.41187	6.06346		0.017813	0.920792	0.891089	9.72177	9.51938
0.008906	1.11765	1.11867	2.37586	2.47897		0.002227	3.37327	2.88064	1.76957	1.7589		0.017813	1.05618	0.977528	4.86991	4.38231		0.008906	0.954128	0.688073	8.01312	7.7437
0.004453	0.911111	1.01111	1.52938	1.66645		0.001113	1.72695	1.59985	1.06065	1.25998		0.008906	1.06818	0.931818	3.41887	2.39198		0.004453	0.920792	0.891089	3.93736	3.92326
0.002227	0.990291	1.09709	1.2677	1.3339		0.000557	1.27262	1.29751	1.24686	1.21654		0.004453	0.890244	0.804878	2.19847	2.07301		0.002227	0.954128	0.688073	2.9901	2.9949
0.001113	0.951613	0.943548	1.17876	1.2754								0.002227	1.07059	0.976471	1.80463	1.39236		0.001113	0.931373	0.862745	2.1298	2.24257
0.000557	0.945736	0.976744	0.955061	1.10847								0.001113	0.936709	0.898734	1.42332	1.23121		0.000557	0.947368	0.95614	1.6347	1.6432

## Sheet: Fig 6B
DENV-1						DENV-2						DENV-3						DENV-4
concentration	DM8-6		DM25-3			concentration	DM8-6		DM25-3			concentration	DM-8-6		DM25-3			concentration	DM-8-6		DM25-3
4	42.6501	42.3242	98.3707	95.7639		4	83.9706	91.0948	98.8126	99.4063		4	45.7014	34.8416	98.19	96.3801		4	51.1136	52.2272	96.2138	98.9978
8	34.5038	26.0316	93.483	88.5952		8	84.5642	85.1579	98.219	97.0316		8	44.6511	35.2245	82.3529	81.9005		8	47.216	44.4321	93.4298	91.7595
16	21.4697	18.2112	86.3142	81.7523		16	90.5011	86.939	92.2821	89.3137		16	39.225	45.8842	73.3032	62.8959		16	43.3185	47.7728	90.6459	90.6459
32	19.1888	10.3908	80.4489	67.4148		32	82.1895	92.2821	82.7832	78.0337		32	25.5056	39.1158	66.0633	60.6335		32	49.4432	47.216	85.6347	86.7483
64	22.4473	21.1439	62.8529	57.3134		64	82.7832	85.7516	61.4106	67.3474		64	20.5594	19.481	56.5611	39.819		64	21.6036	30.5123	81.7372	65.5902
128	9.41321	19.5146	52.0998	29.2902		128	83.3769	79.2211	49.5369	40.038		128	21.884	25.648	48.8688	35.2941		128	31.6258	32.7394	73.9421	70.6013
256	8.7615	13.3234	37.1106	21.1439		256	85.7516	75.0653	47.7559	20.4464		256	31.511	15.9885	36.6516	22.1719		256	26.6147	35.5234	67.2606	60.0223
512	10.3908	16.5819	35.1555	15.2785		512	70.9095	68.5348	35.2885	31.7264		512	30.5	19.4	25.3394	30.3167		512	29.9555	27.7283	63.363	60.0223
1024	4.52543	13.3234	11.3683	10.0649		1024	56.0674	67.3474	15.697	19.2591		1024	27.88	21.447	24.8869	11.7647		1024	30.5123	29.9555	50.5568	36.0802
2048	6.80639	1.91861	0	0		2048	47.1622	43.6001	3.22964	0		2048	19.559	10.22	17.6471	7.23982		2048	16.5924	19.9332	39.4209	25.5011

## Sheet: Fig 6C
DM25-3	IMD2VLP		mD2VLP			DM8-6	IMD2VLP		mD2VLP
1000	2.68349	2.67983	8.68584	8.04386		1000	3.14215	3.25493	11.5268	12.1187
500	2.24017	2.2632	9.08419	8.35643		500	2.41242	2.58749	10.3334	10.3856
250	2.14756	1.7328	8.54365	6.43651		250	1.7584	2.21542	8.36945	8.9795
125	1.3824	1.5484	5.87471	5.206		125	1.7046	1.54997	7.52554	6.23776
63	1.41698	1.16867	3.35086	3.7204		62.5	1.18711	1.2665	4.19358	3.31437
31	1.10771	1.1264	2.56803	2.3526		31.25	1.14706	1.29508	2.6288	2.43102
16	1.04239	1.13799	1.85841	1.55872		15.625	0.948256	0.987834	1.79419	1.70562
8	0.999206	1.2645	1.23016	1.30812		7.8125	1.11224	1.0764	1.43014	1.39356
