# Supplementary material for: Epitope resurfacing on dengue virus-like particle vaccine preparation to induce broad neutralizing antibody
Source: eLife. 2018 Oct 18;7:e38970. doi: 10.7554/eLife.38970 (PMC6234032; doi:10.7554/eLife.38970)
Supplement: Figure 7—source data 1. [file elife-38970-fig7-data1.xlsx]

## Sheet: D1
Days post infection	wtD2VLP	imD2VLP	mD2VLP	TNE
14	1
14	1
16	1
16	1
16	1
16	1
17	1
17	1
21		0
21		0
21		0
21		0
21		0
21		0
21		0
21		0
21		0
21		0
21		0
21		0
16			1
21			0
21			0
21			0
21			0
21			0
21			0
21			0
21			0
21			0
21			0
21			0
21			0
21			0
6				1
9				1
10				1
10				1
10				1
11				1
11				1
11				1
11				1
11				1
11				1
11				1
12				1

## Sheet: D2
Days post infection	wtD2VLP	imD2VLP	mD2VLP	TNE
21	0
21	0
21	0
21	0
21	0
21	0
21	0
21	0
21	0
21	0
21	0
21	0
21		0
21		0
21		0
21		0
21		0
21		0
21		0
21		0
21		0
21		0
21		0
21		0
21		0
21		0
21			0
21			0
21			0
21			0
21			0
21			0
21			0
21			0
21			0
21			0
21			0
21			0
21			0
3				1
5				1
9				1
9				1
12				1
13				1
13				1
14				1
14				1
15				1
15				1
15				1
15				1
16				1
16				1
16				1

## Sheet: D3
Days post infection	wtD2VLP	imD2VLP	mD2VLP	TNE
21	0
21	0
21	0
21	0
21		0
21		0
21		0
21		0
21		0
21		0
21		0
21		0
21		0
21			0
21			0
21			0
21			0
21			0
21			0
21			0
21			0
21			0
21			0
11				1
12				1
12				1
13				1
13				1
14				1
16				1
16				1
16				1
16				1
16				1

## Sheet: D4
Days post infection	wtD2VLP	imD2VLP	mD2VLP	TNE
7	1
11	1
11	1
12	1
14	1
16	1
18	1
21	0
21	0
21	0
21	0
14		1
15		1
15		1
15		1
18		1
21		0
21		0
21		0
21		0
21		0
21		0
21		0
21		0
21		0
21			0
21			0
21			0
21			0
21			0
21			0
21			0
21			0
11				1
11				1
11				1
11				1
13				1
13				1
13				1
14				1
14				1
14				1
14				1
14				1
16				1
18				1
21				1
